# Supplementary material for: Subcellular Peptide Localization in Single Identified Neurons by Capillary Microsampling Mass Spectrometry
Source: PubMed Central journal article supplement (PMC6093924; doi:10.1038/s41598-018-29704-z), 2018-08-15
Supplement: 41598_2018_29704_MOESM1_ESM.pdf [file 41598_2018_29704_MOESM1_ESM.pdf]

*Supplementary Information for*

**Subcellular Peptide Localization in Single Identified Neurons by  
Capillary Microsampling Mass Spectrometry**

Linwen Zhang<sup>1</sup>, Nikkita Khattar<sup>1</sup>, Ildiko Kemenes<sup>2</sup>, Gyorgy Kemenes<sup>2</sup>, Zita Zrinyi<sup>3</sup>,  
Zsolt Pirger<sup>3</sup>, and Akos Vertes<sup>1\*</sup>

<sup>1</sup>Department of Chemistry, The George Washington University, Washington, DC 20052, U.S.A.

<sup>2</sup>Sussex Neuroscience, School of Life Sciences, University of Sussex, Brighton, BN1 9QG, UK

<sup>3</sup>Department of Experimental Zoology, Balaton Limnological Institute, MTA Center for Ecological Research, 8237 Tihany, Hungary

\*Corresponding Author

E-mail: [vertes@gwu.edu](mailto:vertes@gwu.edu). Phone: +1 (202) 994-2717. Fax: +1 (202) 994-5873.

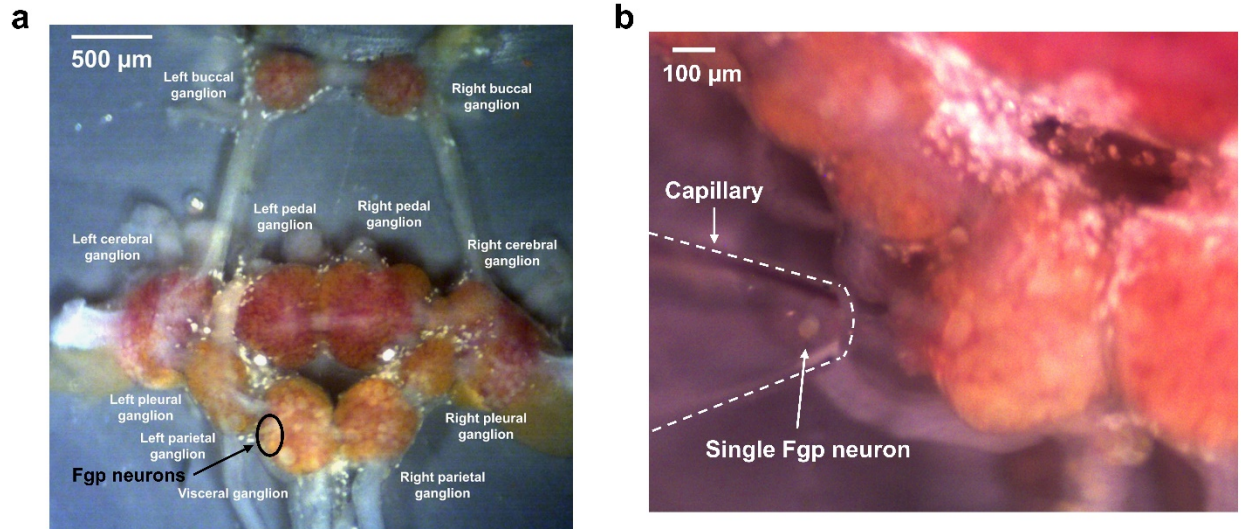

**Supplementary Fig. 1.** (a) Dissected *L. stagnalis* CNS pinned to bottom of a Sylgard dish with its ganglia labelled. A cluster of Fgp neurons are circled on the left lateral region of the visceral ganglion (scale bar is 500  $\mu\text{m}$ ). (b) A single Fgp neuron is isolated by a fire-polished glass capillary (scale bar is 100  $\mu\text{m}$ ).

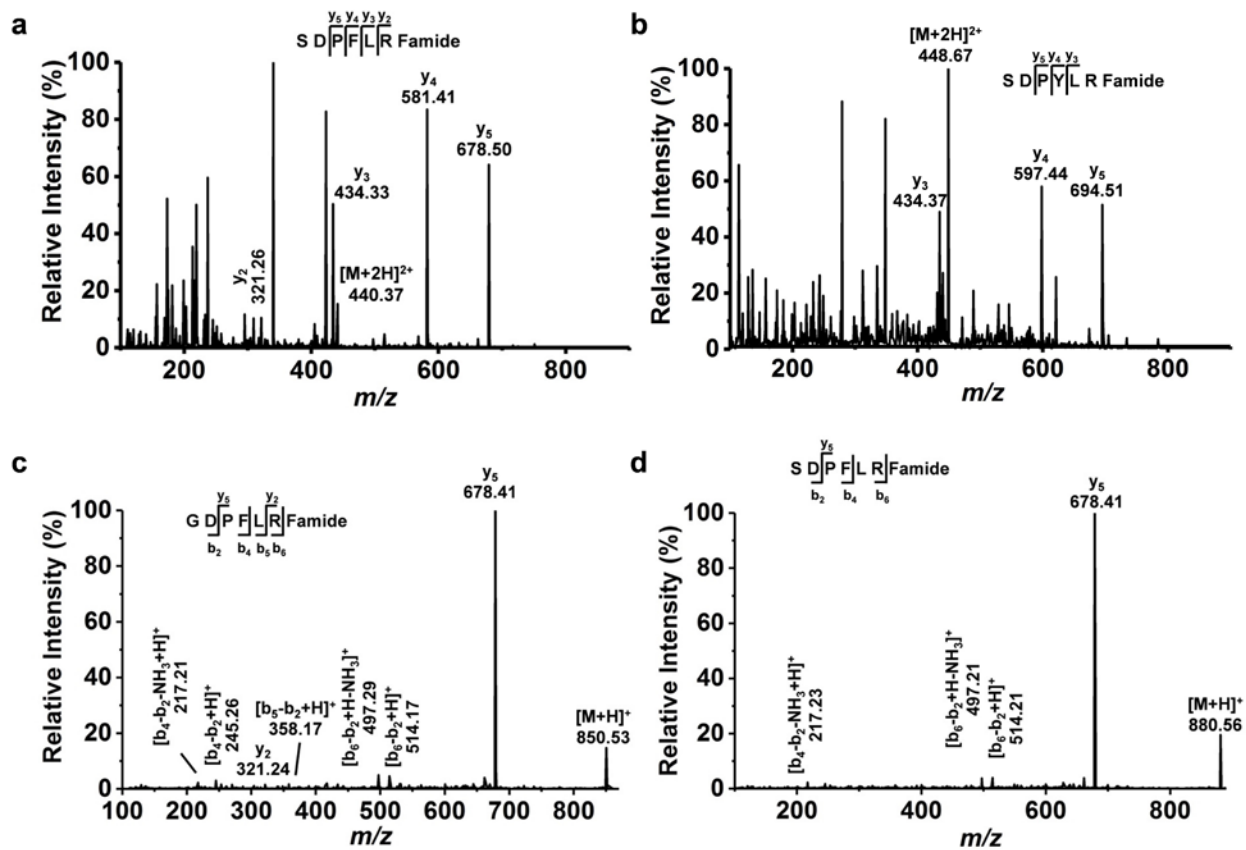

**Supplementary Fig. 2.** Tandem mass spectra from LC-MS/MS of peptides extracted from five snail CNS.

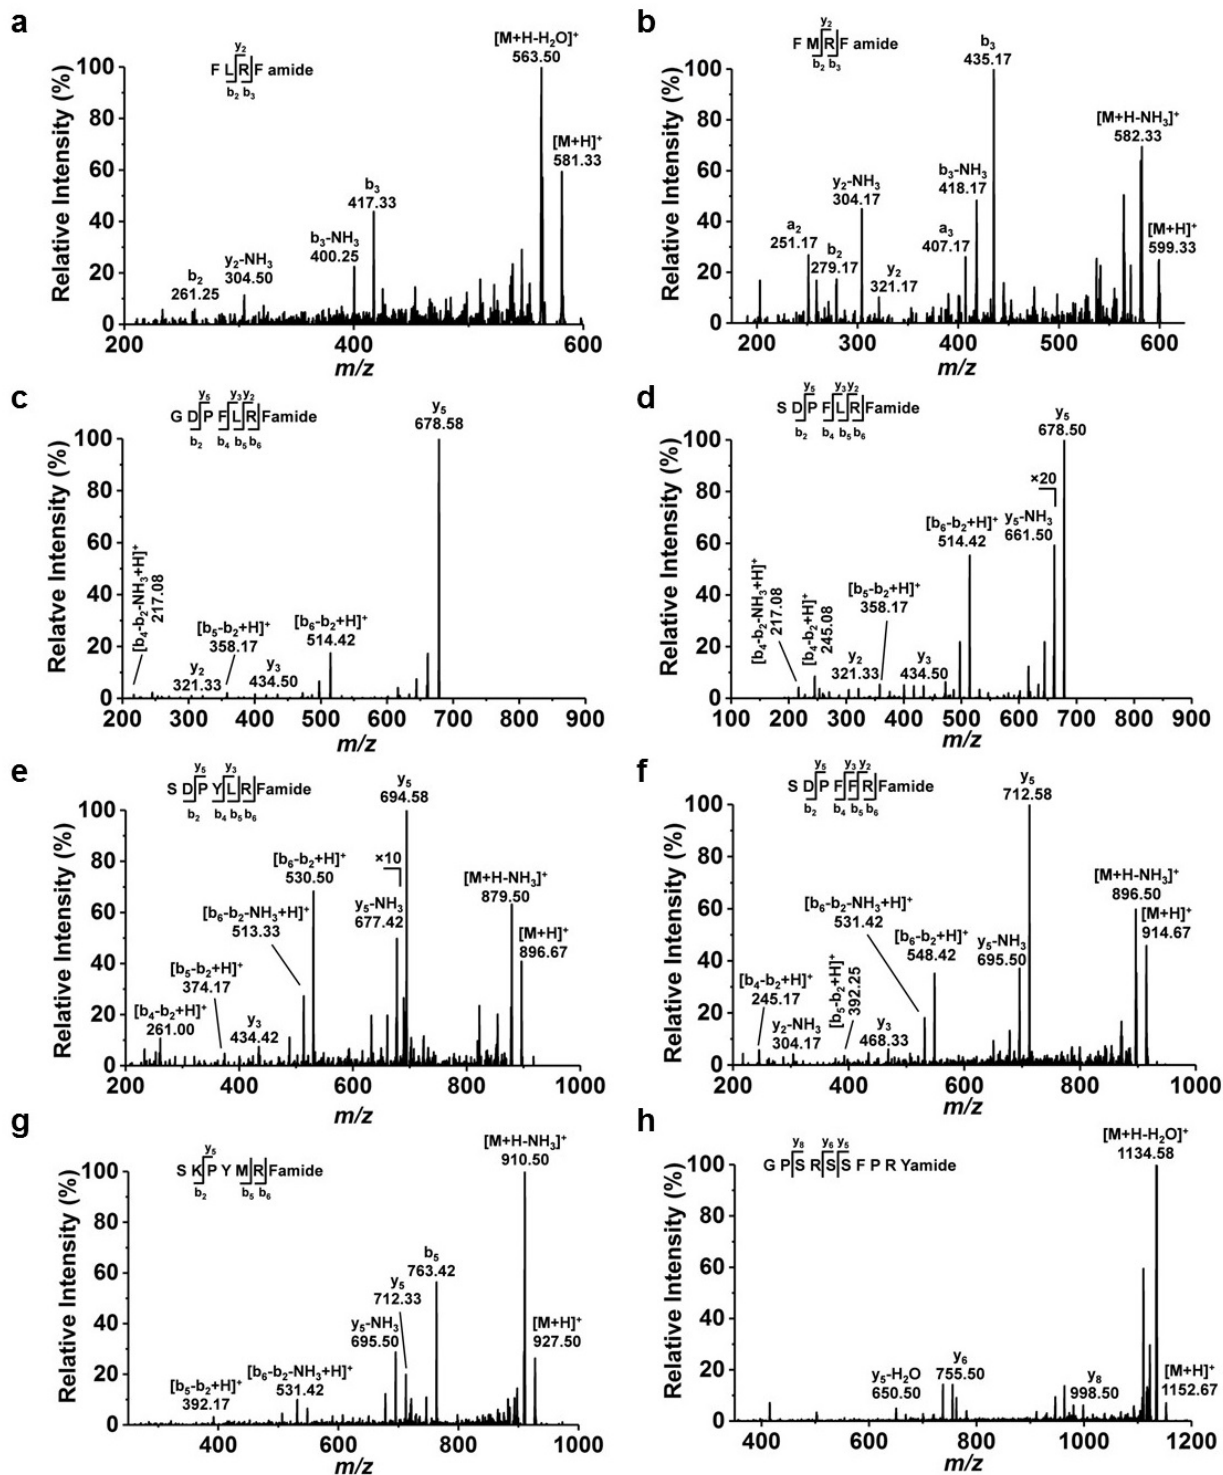

Supplementary Fig. 3. MALDI tandem mass spectra of peptides from a visceral ganglion.



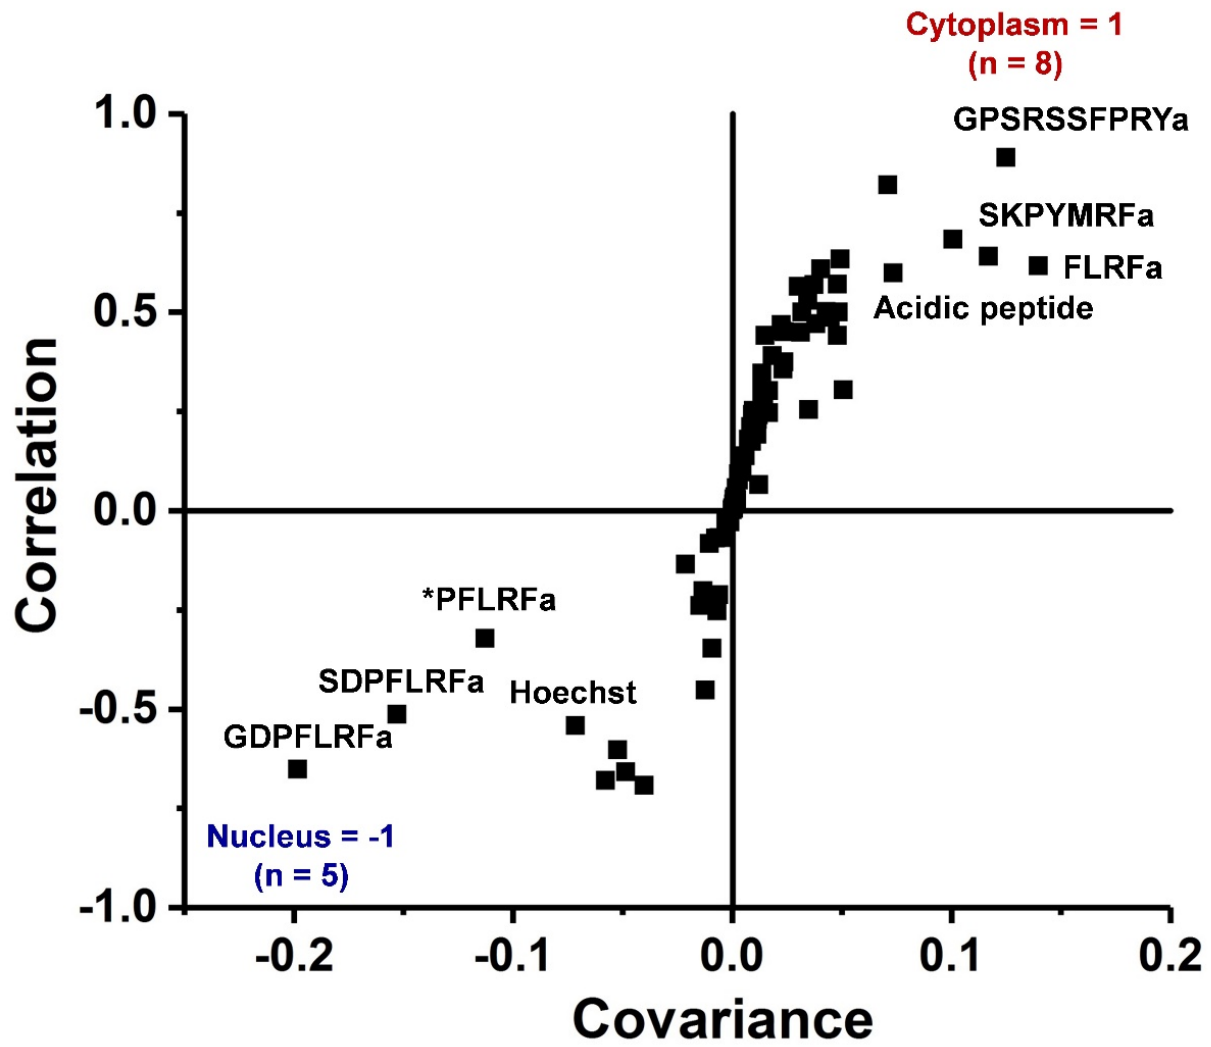

**Supplementary Fig. 5.** S-plot shows differences in neuropeptide compositions between cytoplasm (n = 8) and nucleus (n = 5). Labelled molecular species on the top right and bottom left quadrants correspond to the neuropeptides with higher abundances in cytoplasm and nucleus, respectively.

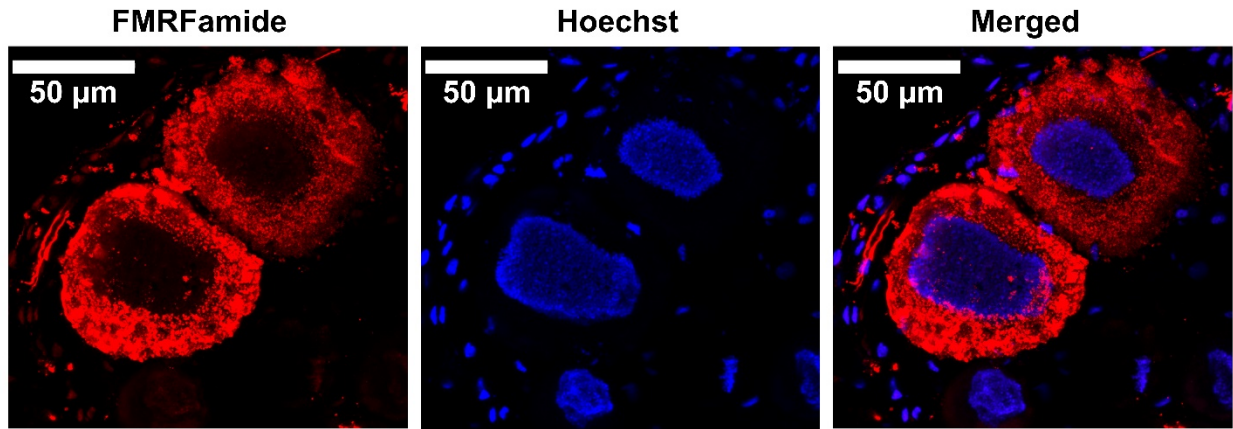

**Supplementary Fig. 6.** Confocal microscope images for Type 1 *L. stagnalis* Fgp neurons immunostained by anti-FMRFamide antibody in red (left) and counterstained by Hoechst 33342 in blue (middle). The corresponding merged image is shown in the right panel.

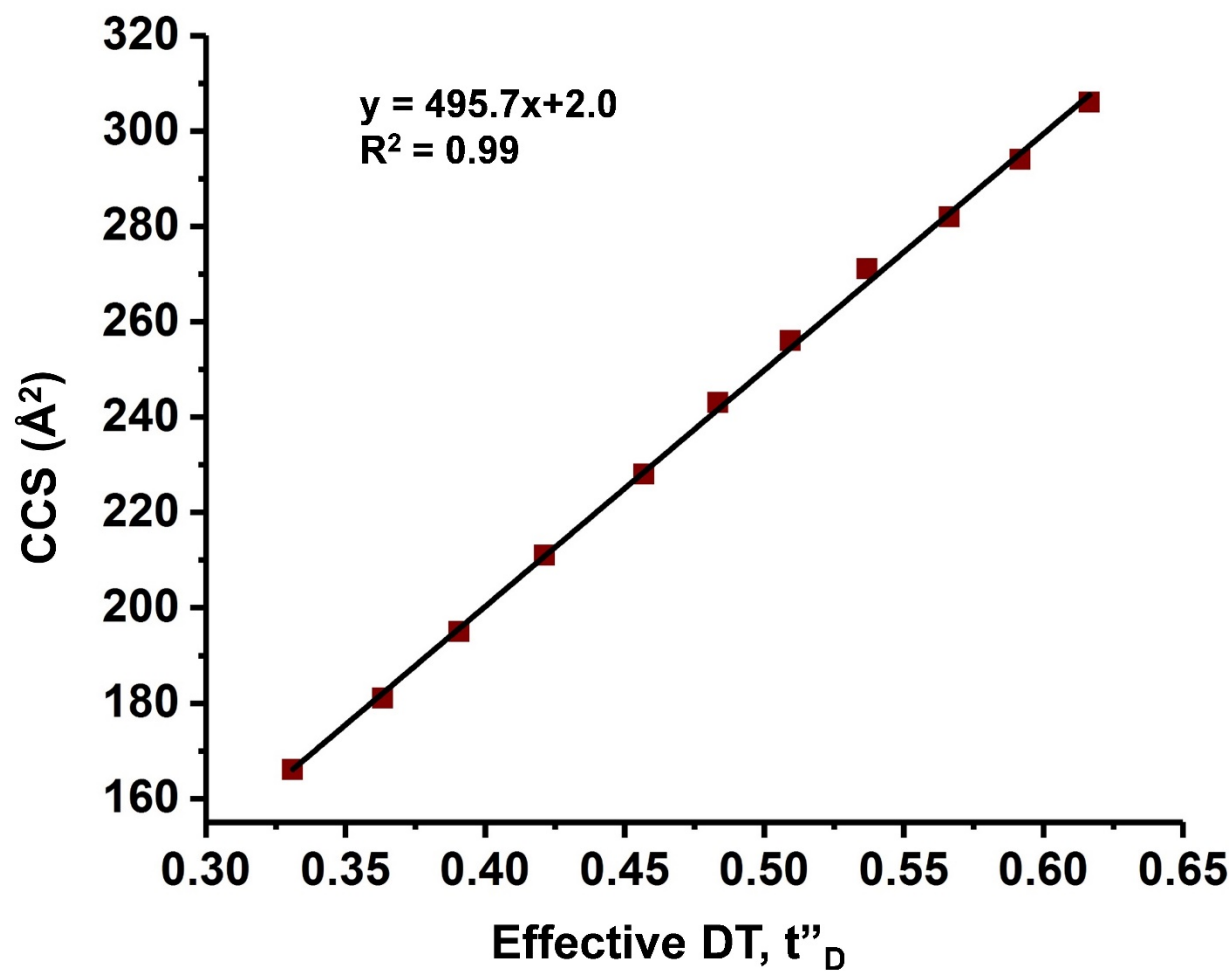

**Supplementary Fig. 7.** CCS calibration curve based on singly charged polyalanine oligomer mixture ( $n = 4-14$ ) as the calibrant.



**Supplementary Table 1.** Neuropeptide ion assignments from cytoplasm of single Type 1 *L. stagnalis* Fgp neuron based on accurate mass measurements and tandem MS by MALDI.

| <b>Sequence</b> | <b>Charge State</b> | <b>Formula</b>                                                                   | <b>m<sub>meas</sub> (Da)</b> | <b>m<sub>calc</sub> (Da)</b> | <b>Δm (mDa)</b> | <b>CCS (Å<sup>2</sup>)</b> |
|-----------------|---------------------|----------------------------------------------------------------------------------|------------------------------|------------------------------|-----------------|----------------------------|
| FLRFa           | +1                  | [C <sub>30</sub> H <sub>44</sub> N <sub>8</sub> O <sub>4</sub> +H] <sup>+</sup>  | 581.358                      | 581.356                      | 2               | 247                        |
| FMRFa           | +1                  | [C <sub>29</sub> H <sub>42</sub> N <sub>8</sub> O <sub>4</sub> S+H] <sup>+</sup> | 599.312                      | 599.312                      | 0               | 246                        |

**Supplementary Table 2.** Neuropeptide assignments from cytoplasm and nucleus of single *L. stagnalis* Type 2 Fgp neurons based on accurate mass measurements and tandem MS in positive ion mode. Measured CCS values and normalized abundances,  $I_C$ , and  $I_N$ , for ions detected from cytoplasm and nucleus, respectively, are also shown.

| Sequence         | Charge State | Formula                                                                               | $m_{\text{meas}}$ (Da)    | $\Delta m$ (mDa) | CCS ( $\text{\AA}^2$ ) | $I_C$ (%) | $I_N$ (%) |
|------------------|--------------|---------------------------------------------------------------------------------------|---------------------------|------------------|------------------------|-----------|-----------|
| FLRFa            | +1           | $[\text{C}_{30}\text{H}_{44}\text{N}_8\text{O}_4+\text{H}]^+$                         | 581.356 <sup>[b]</sup>    | 0                | 247                    | 10.9±3.6  | 6.0±2.8   |
| GDPFLRFa         | +2           | $[\text{C}_{41}\text{H}_{59}\text{N}_{11}\text{O}_9+2\text{H}]^{2+}$                  | 425.740                   | 8                | 165                    | 11.8±3.7  | 21.2±8.2  |
|                  | +2           | $[\text{C}_{41}\text{H}_{59}\text{N}_{11}\text{O}_9+\text{Na}+\text{H}]^{2+}$         | 436.726                   | 3                | 168                    |           |           |
|                  | +2           | $[\text{C}_{41}\text{H}_{59}\text{N}_{11}\text{O}_9+\text{K}+\text{H}]^{2+}$          | 444.710                   | 0                | 167                    |           |           |
|                  | +1           | $[\text{C}_{41}\text{H}_{59}\text{N}_{11}\text{O}_9+\text{H}]^+$                      | 850.457 <sup>[a][b]</sup> | 0                | 289                    |           |           |
|                  | +1           | $[\text{C}_{41}\text{H}_{59}\text{N}_{11}\text{O}_9+\text{Na}]^+$                     | 872.438                   | -1               | 291                    |           |           |
|                  | +1           | $[\text{C}_{41}\text{H}_{59}\text{N}_{11}\text{O}_9+\text{K}]^+$                      | 888.404                   | -9               | 292                    |           |           |
| SDPFLRFa         | +2           | $[\text{C}_{42}\text{H}_{61}\text{N}_{11}\text{O}_{10}+2\text{H}]^{2+}$               | 440.744                   | 7                | 168                    | 15.9±6.1  | 23.0±6.5  |
|                  | +2           | $[\text{C}_{42}\text{H}_{61}\text{N}_{11}\text{O}_{10}+\text{Na}+\text{H}]^{2+}$      | 451.730                   | 2                | 169                    |           |           |
|                  | +2           | $[\text{C}_{42}\text{H}_{61}\text{N}_{11}\text{O}_{10}+\text{K}+\text{H}]^{2+}$       | 459.717                   | 2                | 169                    |           |           |
|                  | +1           | $[\text{C}_{42}\text{H}_{61}\text{N}_{11}\text{O}_{10}+\text{H}]^+$                   | 880.467 <sup>[b]</sup>    | -1               | 291                    |           |           |
|                  | +1           | $[\text{C}_{42}\text{H}_{61}\text{N}_{11}\text{O}_{10}+\text{Na}]^+$                  | 902.447                   | -2               | 295                    |           |           |
|                  | +1           | $[\text{C}_{42}\text{H}_{61}\text{N}_{11}\text{O}_{10}+\text{K}]^+$                   | 918.427                   | 4                | 291                    |           |           |
| SDPYLRFa         | +2           | $[\text{C}_{42}\text{H}_{61}\text{N}_{11}\text{O}_{11}+2\text{H}]^{2+}$               | 448.739                   | 4                | 168                    | 1.1±0.9   | 0         |
|                  | +1           | $[\text{C}_{42}\text{H}_{61}\text{N}_{11}\text{O}_{11}+\text{H}]^+$                   | 896.460 <sup>[b]</sup>    | -2               | 294                    |           |           |
| SDPFFRFa         | +2           | $[\text{C}_{45}\text{H}_{59}\text{N}_{11}\text{O}_{10}+2\text{H}]^{2+}$               | 457.734                   | 4                | 169                    | 0.7±0.3   | 0         |
|                  | +1           | $[\text{C}_{45}\text{H}_{59}\text{N}_{11}\text{O}_{10}+\text{H}]^+$                   | 914.446 <sup>[b]</sup>    | -6               | 295                    |           |           |
| SKPYMRFa         | +2           | $[\text{C}_{43}\text{H}_{66}\text{N}_{12}\text{O}_9\text{S}+2\text{H}]^{2+}$          | 464.254                   | 7                | 173                    | 4.9±1.9   | 1.2±1.2   |
|                  | +2           | $[\text{C}_{43}\text{H}_{66}\text{N}_{12}\text{O}_9\text{S}+\text{Na}+\text{H}]^{2+}$ | 475.238                   | 0                | 175                    |           |           |
|                  | +1           | $[\text{C}_{43}\text{H}_{66}\text{N}_{12}\text{O}_9\text{S}+\text{H}]^+$              | 927.481 <sup>[b]</sup>    | -6               | 297                    |           |           |
|                  | +1           | $[\text{C}_{43}\text{H}_{66}\text{N}_{12}\text{O}_9\text{S}+\text{Na}]^+$             | 949.467                   | -2               | 301                    |           |           |
| GPSRSSFPRYa      | +3           | $[\text{C}_{51}\text{H}_{77}\text{N}_{17}\text{O}_{14}+3\text{H}]^{3+}$               | 384.873                   | 4                | 158                    | 2.8±0.9   | 0         |
|                  | +2           | $[\text{C}_{51}\text{H}_{77}\text{N}_{17}\text{O}_{14}+2\text{H}]^{2+}$               | 576.803                   | 4                | 186                    |           |           |
|                  | +1           | $[\text{C}_{51}\text{H}_{77}\text{N}_{17}\text{O}_{14}+\text{H}]^+$                   | 1152.584 <sup>[b]</sup>   | -7               | 335                    |           |           |
| SDPFFRFGKQQVAT   | +5           | $[\text{C}_{169}\text{H}_{261}\text{N}_{46}\text{O}_{64}+5\text{H}]^{5+}$             | 792.578                   | 1                | 212                    | 1.7±1.2   | 0.4±0.2   |
| DDSGELDDDEILSRVS | +4           | $[\text{C}_{169}\text{H}_{261}\text{N}_{46}\text{O}_{64}+4\text{H}]^{4+}$             | 990.468 <sup>[a]</sup>    | -2               | 222                    |           |           |
| DDDKNI           | +3           | $[\text{C}_{169}\text{H}_{261}\text{N}_{46}\text{O}_{64}+3\text{H}]^{3+}$             | 1320.293                  | 2                | 246                    |           |           |
| NNLNYYALEDEDG    | +3           | $[\text{C}_{142}\text{H}_{215}\text{N}_{39}\text{O}_{54}+3\text{H}]^{3+}$             | 1111.183 <sup>[a]</sup>   | 0                | 228                    | 2.7±2.1   | 3.2±1.9   |
| KLTSDIIDDQFQRYQ  | +3           | $[\text{C}_{142}\text{H}_{215}\text{N}_{39}\text{O}_{54}+2\text{H}+\text{Na}]^{3+}$   | 1118.513                  | 3                | 227                    |           |           |
|                  | +3           | $[\text{C}_{142}\text{H}_{215}\text{N}_{39}\text{O}_{54}+2\text{H}+\text{K}]^{3+}$    | 1123.834                  | -1               | 227                    |           |           |

[a] Identifications were based on tandem MS by capillary microsampling MS at the single cell level.

[b] Identifications were based on tandem MS on a single *L. stagnalis* visceral ganglion with MALDI-MS.
